# Supplementary material for: Pheromone-Mediated Mating Disruption as Management Option for Cydia spp. in Chestnut Orchard
Source: MDPI journal article supplement (doi:10.3390/insects12100905), 2021-10-05
Supplement: s1 [file s1]

**Supplementary Table S1.** Sampling sites monitored in the two-year period 2019–2020.

| Site              | Province  | Region         | Control                |             |                   | Mating disruption      |              |                   |
|-------------------|-----------|----------------|------------------------|-------------|-------------------|------------------------|--------------|-------------------|
|                   |           |                | Geographic coordinates |             | Altitude (a.s.l.) | Geographic coordinates |              | Altitude (a.s.l.) |
|                   |           |                | N                      | E           |                   | N                      | E            |                   |
| Villar Focchiardo | Torino    | Piedmont       | 45°11'24.7"            | 07°22'57.1" | 450 m             | 45°06'00.7"            | 7°14'46.2"   | 470 m             |
| Carro             | La Spezia | Liguria        | 44°06'00.6"            | 09°46'13.3" | 413 m             | 44°16'16.3"            | 9°37'20.5"   | 421 m             |
| Montese           | Modena    | Emilia-Romagna | 44°19'06.1"            | 07°33'18.3" | 857 m             | 44°59'16.95"           | 10°44'53.35" | 869 m             |
| Badia del Borgo   | Firenze   | Tuscany        | 44°04'52.5"            | 11°35'19.7" | 331 m             | 44°04'30.34"           | 11°37'59.67" | 306 m             |

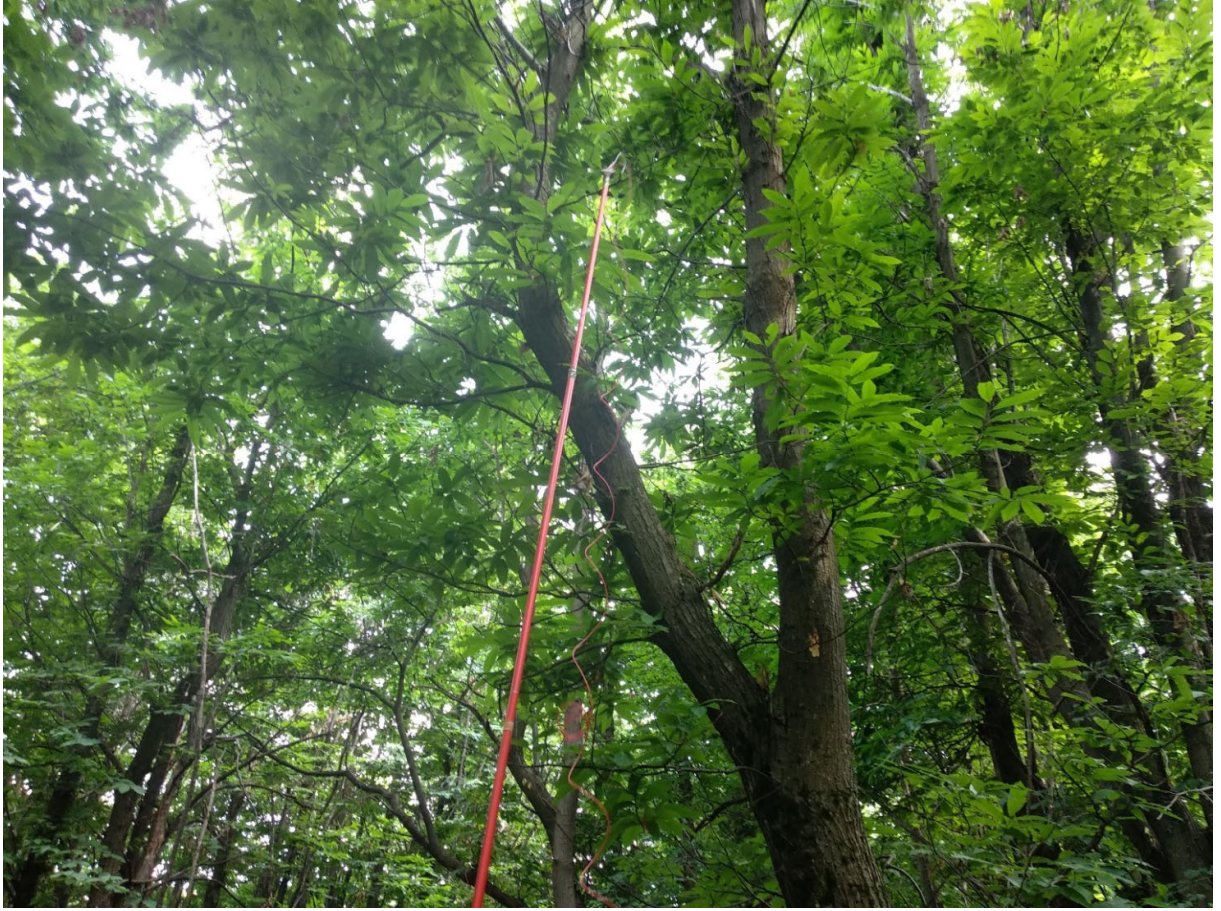

**Supplementary Figure S1.** Positioning of Ecodian CT® pheromone dispenser (red wire) in chestnut orchard, with the aid of lopping shears.
